# Supplementary material for: Climate Change and the Spatiotemporal Variation in Survival of a Long-Distance Migrant (White Stork, Ciconia ciconia) across Western Europe
Source: MDPI journal article supplement (doi:10.3390/birds2040027), 2021-10-31
Supplement: s1 [file s1]

## SUPPLEMENTARY MATERIALS

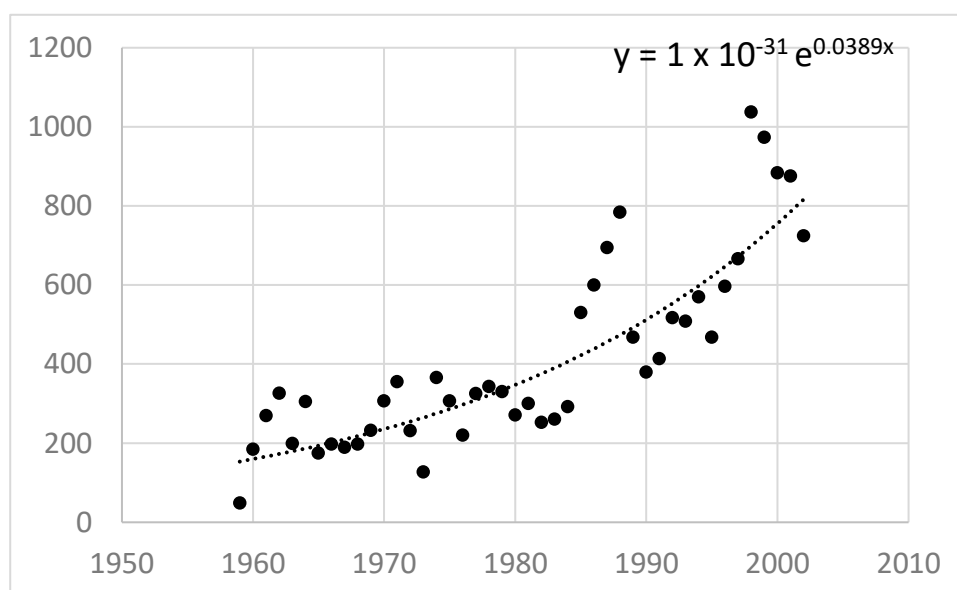

**Figure S1.** Annual ringing effort of the juvenile white storks considered in the study. The trend exponential trend over time is shown. Data source: EURING Data Bank.

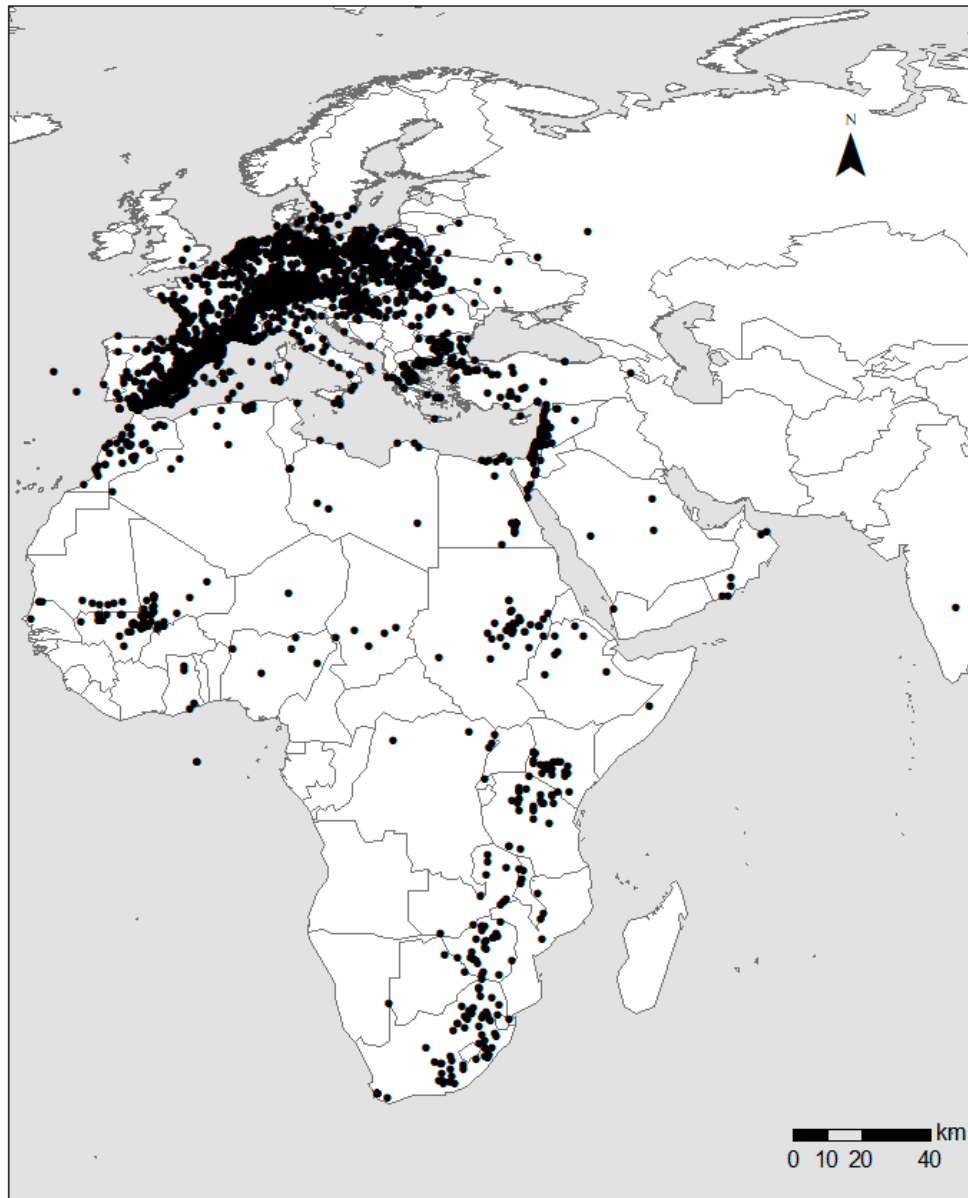

**Figure S2.** Spatial distribution of the annual recoveries (i.e. encountering of a ringed bird, both dead or alive, including resightings) of White Storks (1960-2009). Metal and/or colour rings. Birds were only included in the analysis if the accuracy of the recovery coordinates were within a 50-km radius, according to EURING database. Data source: EURING Data Bank.

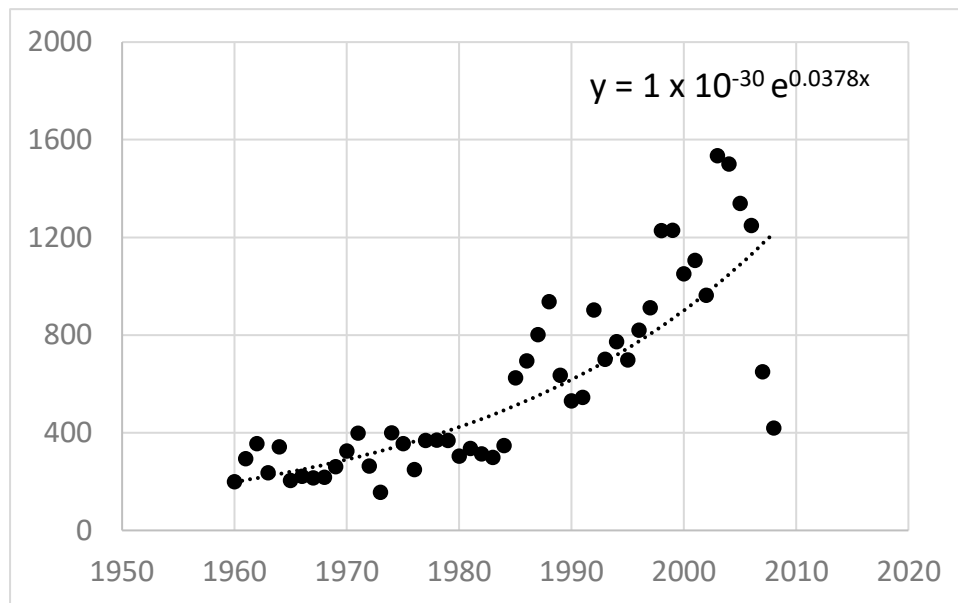

**Figure S3.** Exponential trend over time of the annual recoveries (i.e. encountering of a ringed bird, both dead or alive, including resightings) of White Storks (1960-2009). Metal and/or colour rings. Birds were only included in the analysis if the accuracy of the recovery coordinates were within a 50-km radius, according to EURING database. Data source: EURING Data Bank.

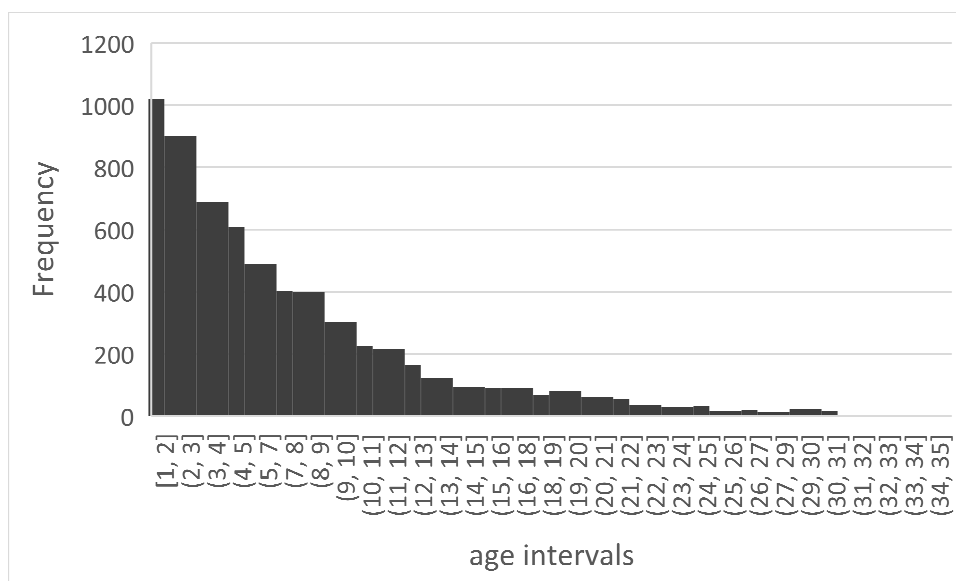

**Figure S4.** Frequency histogram of the age at the recovery (1960-2009). Data source: EURING Data Bank.

**Table S1.** Survival estimates ( $\phi$ : survival;  $p$ : recapture) based on mean individual covariate values. Standard Error (S.E) and Confidence Intervals (C.I.) corrected for  $\hat{c} = 1.86$ .

| <b>Estimate<br/>number</b> | <b>Estimate</b> | <b>S.E.</b> | <b>+95% C.I.</b> | <b>-95% C.I.</b> |
|----------------------------|-----------------|-------------|------------------|------------------|
| 1: $\phi$                  | 0.505           | 0.077       | 0.358            | 0.651            |
| 2: $\phi$                  | 0.545           | 0.035       | 0.476            | 0.612            |
| 3: $\phi$                  | 0.428           | 0.031       | 0.369            | 0.488            |
| 4: $\phi$                  | 0.500           | 0.048       | 0.407            | 0.592            |
| 5: $\phi$                  | 0.542           | 0.070       | 0.406            | 0.673            |
| 6: $\phi$                  | 0.530           | 0.049       | 0.435            | 0.623            |
| 7: $\phi$                  | 0.602           | 0.046       | 0.509            | 0.688            |
| 8: $\phi$                  | 0.551           | 0.038       | 0.476            | 0.623            |
| 9: $\phi$                  | 0.593           | 0.031       | 0.530            | 0.652            |
| 10: $\phi$                 | 0.516           | 0.045       | 0.428            | 0.603            |
| 11: $\phi$                 | 0.667           | 0.041       | 0.581            | 0.742            |
| 12: $\phi$                 | 0.659           | 0.046       | 0.564            | 0.743            |
| 13: $\phi$                 | 0.452           | 0.070       | 0.321            | 0.590            |
| 14: $\phi$                 | 0.611           | 0.032       | 0.547            | 0.671            |
| 15: $\phi$                 | 0.491           | 0.044       | 0.406            | 0.577            |
| 16: $\phi$                 | 0.527           | 0.032       | 0.464            | 0.590            |
| 17: $\phi$                 | 0.508           | 0.053       | 0.405            | 0.610            |
| 18: $\phi$                 | 0.459           | 0.036       | 0.391            | 0.529            |
| 19: $\phi$                 | 0.595           | 0.033       | 0.530            | 0.657            |
| 20: $\phi$                 | 0.628           | 0.036       | 0.556            | 0.695            |
| 21: $\phi$                 | 0.633           | 0.035       | 0.562            | 0.699            |
| 22: $\phi$                 | 0.452           | 0.029       | 0.396            | 0.509            |
| 23: $\phi$                 | 0.682           | 0.034       | 0.612            | 0.744            |
| 24: $\phi$                 | 0.642           | 0.035       | 0.571            | 0.707            |
| 25: $\phi$                 | 0.630           | 0.035       | 0.560            | 0.696            |
| 26: $\phi$                 | 0.549           | 0.032       | 0.486            | 0.610            |
| 27: $\phi$                 | 0.562           | 0.030       | 0.503            | 0.620            |
| 28: $\phi$                 | 0.546           | 0.038       | 0.472            | 0.618            |
| 29: $\phi$                 | 0.382           | 0.024       | 0.337            | 0.430            |
| 30: $\phi$                 | 0.427           | 0.025       | 0.379            | 0.477            |
| 31: $\phi$                 | 0.152           | 0.017       | 0.122            | 0.188            |
| 32: $\phi$                 | 0.496           | 0.028       | 0.442            | 0.550            |
| 33: $\phi$                 | 0.631           | 0.032       | 0.568            | 0.691            |
| 34: $\phi$                 | 0.474           | 0.037       | 0.402            | 0.546            |
| 35: $\phi$                 | 0.349           | 0.029       | 0.295            | 0.407            |
| 36: $\phi$                 | 0.433           | 0.026       | 0.382            | 0.485            |
| 37: $\phi$                 | 0.572           | 0.033       | 0.507            | 0.634            |
| 38: $\phi$                 | 0.341           | 0.023       | 0.299            | 0.387            |
| 39: $\phi$                 | 0.231           | 0.018       | 0.197            | 0.269            |
| 40: $\phi$                 | 0.291           | 0.024       | 0.245            | 0.341            |
| 41: $\phi$                 | 0.092           | 0.013       | 0.069            | 0.122            |
| 42: $\phi$                 | 0.087           | 0.011       | 0.068            | 0.111            |

| <b>Estimate<br/>number</b> | <b>Estimate</b> | <b>S.E.</b> | <b>+95% C.I.</b> | <b>-95% C.I.</b> |
|----------------------------|-----------------|-------------|------------------|------------------|
| 43: $\phi$                 | 0.324           | 0.027       | 0.273            | 0.378            |
| 44: $\phi$                 | 0.166           | 0.018       | 0.133            | 0.205            |
| 45: $\phi$                 | 0.197           | 0.019       | 0.163            | 0.237            |
| 46: $\phi$                 | 0.124           | 0.014       | 0.100            | 0.155            |
| 47: $\phi$                 | 0.146           | 0.016       | 0.117            | 0.179            |
| 48: $\phi$                 | 0.089           | 0.014       | 0.066            | 0.120            |
| 49: $\phi$                 | 0.082           | 0.012       | 0.061            | 0.109            |
| 50: $\phi$                 | 0.774           | 0.028       | 0.715            | 0.825            |
| 51: $\phi$                 | 0.732           | 0.035       | 0.657            | 0.795            |
| 52: $\phi$                 | 0.722           | 0.047       | 0.622            | 0.804            |
| 53: $\phi$                 | 0.672           | 0.069       | 0.526            | 0.791            |
| 54: $\phi$                 | 0.505           | 0.048       | 0.413            | 0.598            |
| 55: $\phi$                 | 0.686           | 0.044       | 0.596            | 0.765            |
| 56: $\phi$                 | 0.752           | 0.031       | 0.686            | 0.807            |
| 57: $\phi$                 | 0.812           | 0.023       | 0.763            | 0.853            |
| 58: $\phi$                 | 0.483           | 0.043       | 0.401            | 0.567            |
| 59: $\phi$                 | 0.774           | 0.036       | 0.695            | 0.837            |
| 60: $\phi$                 | 0.803           | 0.037       | 0.720            | 0.865            |
| 61: $\phi$                 | 0.223           | 0.055       | 0.134            | 0.347            |
| 62: $\phi$                 | 0.792           | 0.025       | 0.739            | 0.837            |
| 63: $\phi$                 | 0.419           | 0.042       | 0.339            | 0.503            |
| 64: $\phi$                 | 0.708           | 0.030       | 0.645            | 0.763            |
| 65: $\phi$                 | 0.361           | 0.051       | 0.269            | 0.465            |
| 66: $\phi$                 | 0.583           | 0.036       | 0.511            | 0.652            |
| 67: $\phi$                 | 0.768           | 0.027       | 0.712            | 0.817            |
| 68: $\phi$                 | 0.668           | 0.034       | 0.599            | 0.731            |
| 69: $\phi$                 | 0.828           | 0.025       | 0.775            | 0.871            |
| 70: $\phi$                 | 0.743           | 0.027       | 0.687            | 0.793            |
| 71: $\phi$                 | 0.781           | 0.029       | 0.720            | 0.833            |
| 72: $\phi$                 | 0.858           | 0.021       | 0.812            | 0.894            |
| 73: $\phi$                 | 0.725           | 0.029       | 0.664            | 0.778            |
| 74: $\phi$                 | 0.808           | 0.026       | 0.752            | 0.854            |
| 75: $\phi$                 | 0.819           | 0.022       | 0.772            | 0.857            |
| 76: $\phi$                 | 0.793           | 0.033       | 0.720            | 0.851            |
| 77: $\phi$                 | 0.729           | 0.027       | 0.672            | 0.780            |
| 78: $\phi$                 | 0.757           | 0.026       | 0.702            | 0.804            |
| 79: $\phi$                 | 0.508           | 0.036       | 0.438            | 0.578            |
| 80: $\phi$                 | 0.793           | 0.022       | 0.746            | 0.834            |
| 81: $\phi$                 | 0.801           | 0.025       | 0.748            | 0.844            |
| 82: $\phi$                 | 0.552           | 0.037       | 0.478            | 0.623            |
| 83: $\phi$                 | 0.684           | 0.033       | 0.616            | 0.745            |
| 84: $\phi$                 | 0.757           | 0.024       | 0.707            | 0.802            |
| 85: $\phi$                 | 0.642           | 0.030       | 0.582            | 0.699            |
| 86: $\phi$                 | 0.715           | 0.026       | 0.661            | 0.764            |

| <b>Estimate<br/>number</b> | <b>Estimate</b> | <b>S.E.</b> | <b>+95% C.I.</b> | <b>-95% C.I.</b> |
|----------------------------|-----------------|-------------|------------------|------------------|
| 87: $\phi$                 | 0.595           | 0.028       | 0.539            | 0.650            |
| 88: $\phi$                 | 0.651           | 0.040       | 0.570            | 0.724            |
| 89: $\phi$                 | 0.337           | 0.045       | 0.255            | 0.430            |
| 90: $\phi$                 | 0.363           | 0.036       | 0.297            | 0.436            |
| 91: $\phi$                 | 0.641           | 0.035       | 0.571            | 0.706            |
| 92: $\phi$                 | 0.505           | 0.054       | 0.401            | 0.610            |
| 93: $\phi$                 | 0.571           | 0.039       | 0.494            | 0.645            |
| 94: $\phi$                 | 0.434           | 0.036       | 0.366            | 0.504            |
| 95: $\phi$                 | 0.485           | 0.045       | 0.398            | 0.573            |
| 96: $\phi$                 | 0.343           | 0.047       | 0.258            | 0.439            |
| 97: $\phi$                 | 0.309           | 0.042       | 0.234            | 0.396            |
| 98: $\phi$                 | 0.970           | 0.012       | 0.934            | 0.987            |
| 99: $\phi$                 | 0.901           | 0.041       | 0.787            | 0.957            |
| 100: $\phi$                | 0.725           | 0.039       | 0.643            | 0.794            |
| 101: $\phi$                | 0.823           | 0.038       | 0.737            | 0.885            |
| 102: $\phi$                | 0.854           | 0.025       | 0.798            | 0.896            |
| 103: $\phi$                | 0.876           | 0.017       | 0.839            | 0.906            |
| 104: $\phi$                | 0.712           | 0.032       | 0.645            | 0.771            |
| 105: $\phi$                | 0.882           | 0.029       | 0.813            | 0.928            |
| 106: $\phi$                | 0.933           | 0.021       | 0.877            | 0.964            |
| 107: $\phi$                | 0.739           | 0.106       | 0.490            | 0.893            |
| 108: $\phi$                | 0.832           | 0.021       | 0.788            | 0.869            |
| 109: $\phi$                | 0.699           | 0.046       | 0.603            | 0.781            |
| 110: $\phi$                | 0.764           | 0.024       | 0.713            | 0.808            |
| 111: $\phi$                | 0.712           | 0.054       | 0.595            | 0.807            |
| 112: $\phi$                | 0.645           | 0.044       | 0.555            | 0.725            |
| 113: $\phi$                | 0.842           | 0.022       | 0.795            | 0.880            |
| 114: $\phi$                | 0.806           | 0.023       | 0.757            | 0.847            |
| 115: $\phi$                | 0.942           | 0.013       | 0.909            | 0.963            |
| 116: $\phi$                | 0.785           | 0.022       | 0.738            | 0.826            |
| 117: $\phi$                | 0.865           | 0.022       | 0.815            | 0.903            |
| 118: $\phi$                | 0.964           | 0.008       | 0.944            | 0.977            |
| 119: $\phi$                | 0.800           | 0.023       | 0.751            | 0.841            |
| 120: $\phi$                | 0.971           | 0.009       | 0.948            | 0.984            |
| 121: $\phi$                | 0.923           | 0.012       | 0.896            | 0.943            |
| 122: $\phi$                | 0.983           | 0.007       | 0.962            | 0.992            |
| 123: $\phi$                | 0.917           | 0.015       | 0.882            | 0.943            |
| 124: $\phi$                | 0.935           | 0.013       | 0.904            | 0.956            |
| 125: $\phi$                | 0.874           | 0.033       | 0.793            | 0.926            |
| 126: $\phi$                | 0.915           | 0.012       | 0.888            | 0.937            |
| 127: $\phi$                | 0.867           | 0.019       | 0.824            | 0.900            |
| 128: $\phi$                | 0.663           | 0.043       | 0.575            | 0.742            |
| 129: $\phi$                | 0.806           | 0.024       | 0.755            | 0.848            |
| 130: $\phi$                | 0.863           | 0.015       | 0.831            | 0.889            |

| Estimate<br>number | Estimate | S.E.  | +95% C.I. | -95% C.I. |
|--------------------|----------|-------|-----------|-----------|
| 131: $\phi$        | 0.757    | 0.021 | 0.714     | 0.796     |
| 132: $\phi$        | 0.930    | 0.015 | 0.894     | 0.954     |
| 133: $\phi$        | 0.728    | 0.018 | 0.692     | 0.762     |
| 134: $\phi$        | 0.922    | 0.021 | 0.870     | 0.954     |
| 135: $\phi$        | 0.310    | 0.030 | 0.254     | 0.372     |
| 136: $\phi$        | 0.775    | 0.052 | 0.657     | 0.861     |
| 137: $\phi$        | 0.620    | 0.035 | 0.550     | 0.685     |
| 138: $\phi$        | 0.939    | 0.026 | 0.862     | 0.974     |
| 139: $\phi$        | 0.928    | 0.024 | 0.864     | 0.963     |
| 140: $\phi$        | 0.538    | 0.019 | 0.501     | 0.574     |
| 141: $\phi$        | 0.919    | 0.031 | 0.834     | 0.963     |
| 142: $\phi$        | 0.348    | 0.031 | 0.291     | 0.410     |
| 143: $\phi$        | 0.288    | 0.028 | 0.237     | 0.345     |
| 144: $p$           | 0.057    | 0.005 | 0.048     | 0.069     |
| 145: $p$           | 0.058    | 0.005 | 0.048     | 0.069     |
| 146: $p$           | 0.058    | 0.005 | 0.049     | 0.069     |
| 147: $p$           | 0.059    | 0.005 | 0.049     | 0.070     |
| 148: $p$           | 0.059    | 0.005 | 0.049     | 0.070     |
| 149: $p$           | 0.059    | 0.005 | 0.050     | 0.071     |
| 150: $p$           | 0.060    | 0.005 | 0.050     | 0.071     |
| 151: $p$           | 0.060    | 0.005 | 0.051     | 0.071     |
| 152: $p$           | 0.061    | 0.005 | 0.051     | 0.072     |
| 153: $p$           | 0.061    | 0.005 | 0.052     | 0.073     |
| 154: $p$           | 0.062    | 0.005 | 0.052     | 0.073     |
| 155: $p$           | 0.063    | 0.005 | 0.053     | 0.074     |
| 156: $p$           | 0.063    | 0.005 | 0.053     | 0.074     |
| 157: $p$           | 0.064    | 0.005 | 0.054     | 0.075     |
| 158: $p$           | 0.065    | 0.005 | 0.055     | 0.076     |
| 159: $p$           | 0.065    | 0.005 | 0.056     | 0.077     |
| 160: $p$           | 0.066    | 0.005 | 0.056     | 0.078     |
| 161: $p$           | 0.067    | 0.005 | 0.057     | 0.079     |
| 162: $p$           | 0.068    | 0.005 | 0.058     | 0.080     |
| 163: $p$           | 0.069    | 0.005 | 0.059     | 0.081     |
| 164: $p$           | 0.070    | 0.005 | 0.060     | 0.082     |
| 165: $p$           | 0.072    | 0.006 | 0.061     | 0.083     |
| 166: $p$           | 0.073    | 0.006 | 0.063     | 0.084     |
| 167: $p$           | 0.074    | 0.006 | 0.064     | 0.086     |
| 168: $p$           | 0.076    | 0.006 | 0.065     | 0.087     |
| 169: $p$           | 0.077    | 0.006 | 0.067     | 0.089     |
| 170: $p$           | 0.079    | 0.006 | 0.068     | 0.091     |
| 171: $p$           | 0.081    | 0.006 | 0.070     | 0.093     |
| 172: $p$           | 0.083    | 0.006 | 0.072     | 0.095     |
| 173: $p$           | 0.085    | 0.006 | 0.074     | 0.098     |
| 174: $p$           | 0.087    | 0.006 | 0.076     | 0.100     |

| <b>Estimate<br/>number</b> | <b>Estimate</b> | <b>S.E.</b> | <b>+95% C.I.</b> | <b>-95% C.I.</b> |
|----------------------------|-----------------|-------------|------------------|------------------|
| 175: <i>p</i>              | 0.090           | 0.006       | 0.078            | 0.103            |
| 176: <i>p</i>              | 0.093           | 0.006       | 0.081            | 0.106            |
| 177: <i>p</i>              | 0.096           | 0.007       | 0.083            | 0.109            |
| 178: <i>p</i>              | 0.099           | 0.007       | 0.086            | 0.113            |
| 179: <i>p</i>              | 0.102           | 0.007       | 0.089            | 0.117            |
| 180: <i>p</i>              | 0.106           | 0.007       | 0.093            | 0.122            |
| 181: <i>p</i>              | 0.111           | 0.008       | 0.096            | 0.127            |
| 182: <i>p</i>              | 0.115           | 0.008       | 0.100            | 0.132            |
| 183: <i>p</i>              | 0.120           | 0.009       | 0.104            | 0.139            |
| 184: <i>p</i>              | 0.126           | 0.009       | 0.109            | 0.146            |
| 185: <i>p</i>              | 0.132           | 0.010       | 0.113            | 0.153            |
| 186: <i>p</i>              | 0.139           | 0.011       | 0.119            | 0.162            |
| 187: <i>p</i>              | 0.146           | 0.012       | 0.124            | 0.171            |
| 188: <i>p</i>              | 0.154           | 0.013       | 0.130            | 0.182            |
| 189: <i>p</i>              | 0.163           | 0.014       | 0.137            | 0.194            |
| 190: <i>p</i>              | 0.173           | 0.016       | 0.144            | 0.207            |
| 191: <i>p</i>              | 0.185           | 0.018       | 0.152            | 0.222            |
| 192: <i>p</i>              | 0.197           | 0.020       | 0.161            | 0.239            |
| 193: <i>p</i>              | 0.083           | 0.006       | 0.072            | 0.096            |
| 194: <i>p</i>              | 0.083           | 0.006       | 0.072            | 0.096            |
| 195: <i>p</i>              | 0.084           | 0.006       | 0.073            | 0.097            |
| 196: <i>p</i>              | 0.085           | 0.006       | 0.073            | 0.097            |
| 197: <i>p</i>              | 0.085           | 0.006       | 0.074            | 0.098            |
| 198: <i>p</i>              | 0.086           | 0.006       | 0.075            | 0.098            |
| 199: <i>p</i>              | 0.086           | 0.006       | 0.075            | 0.099            |
| 200: <i>p</i>              | 0.087           | 0.006       | 0.076            | 0.100            |
| 201: <i>p</i>              | 0.088           | 0.006       | 0.077            | 0.100            |
| 202: <i>p</i>              | 0.089           | 0.006       | 0.078            | 0.101            |
| 203: <i>p</i>              | 0.090           | 0.006       | 0.079            | 0.102            |
| 204: <i>p</i>              | 0.090           | 0.006       | 0.080            | 0.103            |
| 205: <i>p</i>              | 0.091           | 0.006       | 0.080            | 0.104            |
| 206: <i>p</i>              | 0.092           | 0.006       | 0.082            | 0.105            |
| 207: <i>p</i>              | 0.094           | 0.006       | 0.083            | 0.106            |
| 208: <i>p</i>              | 0.095           | 0.006       | 0.084            | 0.107            |
| 209: <i>p</i>              | 0.096           | 0.006       | 0.085            | 0.108            |
| 210: <i>p</i>              | 0.097           | 0.006       | 0.087            | 0.109            |
| 211: <i>p</i>              | 0.099           | 0.006       | 0.088            | 0.111            |
| 212: <i>p</i>              | 0.100           | 0.006       | 0.090            | 0.112            |
| 213: <i>p</i>              | 0.102           | 0.006       | 0.091            | 0.114            |
| 214: <i>p</i>              | 0.104           | 0.006       | 0.093            | 0.116            |
| 215: <i>p</i>              | 0.106           | 0.006       | 0.095            | 0.118            |
| 216: <i>p</i>              | 0.108           | 0.006       | 0.097            | 0.120            |
| 217: <i>p</i>              | 0.110           | 0.006       | 0.099            | 0.122            |
| 218: <i>p</i>              | 0.112           | 0.006       | 0.102            | 0.124            |



| <b>Estimate<br/>number</b> | <b>Estimate</b> | <b>S.E.</b> | <b>+95% C.I.</b> | <b>-95% C.I.</b> |
|----------------------------|-----------------|-------------|------------------|------------------|
| 219: <i>p</i>              | 0.115           | 0.006       | 0.104            | 0.127            |
| 220: <i>p</i>              | 0.118           | 0.006       | 0.107            | 0.129            |
| 221: <i>p</i>              | 0.121           | 0.006       | 0.110            | 0.133            |
| 222: <i>p</i>              | 0.124           | 0.006       | 0.113            | 0.136            |
| 223: <i>p</i>              | 0.127           | 0.006       | 0.116            | 0.140            |
| 224: <i>p</i>              | 0.131           | 0.006       | 0.119            | 0.144            |
| 225: <i>p</i>              | 0.135           | 0.006       | 0.123            | 0.148            |
| 226: <i>p</i>              | 0.139           | 0.007       | 0.127            | 0.153            |
| 227: <i>p</i>              | 0.144           | 0.007       | 0.131            | 0.158            |
| 228: <i>p</i>              | 0.149           | 0.007       | 0.136            | 0.164            |
| 229: <i>p</i>              | 0.155           | 0.008       | 0.141            | 0.171            |
| 230: <i>p</i>              | 0.161           | 0.008       | 0.146            | 0.178            |
| 231: <i>p</i>              | 0.168           | 0.009       | 0.151            | 0.186            |
| 232: <i>p</i>              | 0.175           | 0.010       | 0.157            | 0.195            |
| 233: <i>p</i>              | 0.183           | 0.011       | 0.163            | 0.205            |
| 234: <i>p</i>              | 0.192           | 0.012       | 0.170            | 0.216            |
| 235: <i>p</i>              | 0.202           | 0.013       | 0.178            | 0.228            |
| 236: <i>p</i>              | 0.212           | 0.014       | 0.185            | 0.241            |
| 237: <i>p</i>              | 0.224           | 0.016       | 0.194            | 0.256            |
| 238: <i>p</i>              | 0.236           | 0.018       | 0.203            | 0.273            |
| 239: <i>p</i>              | 0.250           | 0.020       | 0.213            | 0.291            |
| 240: <i>p</i>              | 0.266           | 0.022       | 0.225            | 0.311            |
| 241: <i>p</i>              | 0.107           | 0.007       | 0.094            | 0.122            |
| 242: <i>p</i>              | 0.108           | 0.007       | 0.095            | 0.122            |
| 243: <i>p</i>              | 0.109           | 0.007       | 0.096            | 0.123            |
| 244: <i>p</i>              | 0.109           | 0.007       | 0.097            | 0.124            |
| 245: <i>p</i>              | 0.110           | 0.007       | 0.097            | 0.124            |
| 246: <i>p</i>              | 0.111           | 0.007       | 0.098            | 0.125            |
| 247: <i>p</i>              | 0.112           | 0.007       | 0.099            | 0.126            |
| 248: <i>p</i>              | 0.113           | 0.007       | 0.100            | 0.127            |
| 249: <i>p</i>              | 0.114           | 0.007       | 0.102            | 0.128            |
| 250: <i>p</i>              | 0.115           | 0.007       | 0.103            | 0.129            |
| 251: <i>p</i>              | 0.116           | 0.007       | 0.104            | 0.130            |
| 252: <i>p</i>              | 0.118           | 0.007       | 0.105            | 0.131            |
| 253: <i>p</i>              | 0.119           | 0.007       | 0.107            | 0.132            |
| 254: <i>p</i>              | 0.121           | 0.006       | 0.108            | 0.134            |
| 255: <i>p</i>              | 0.122           | 0.006       | 0.110            | 0.135            |
| 256: <i>p</i>              | 0.124           | 0.006       | 0.112            | 0.137            |
| 257: <i>p</i>              | 0.126           | 0.006       | 0.114            | 0.138            |
| 258: <i>p</i>              | 0.127           | 0.006       | 0.116            | 0.140            |
| 259: <i>p</i>              | 0.129           | 0.006       | 0.118            | 0.142            |
| 260: <i>p</i>              | 0.132           | 0.006       | 0.120            | 0.144            |
| 261: <i>p</i>              | 0.134           | 0.006       | 0.123            | 0.146            |
| 262: <i>p</i>              | 0.137           | 0.006       | 0.125            | 0.148            |

| <b>Estimate<br/>number</b> | <b>Estimate</b> | <b>S.E.</b> | <b>+95% C.I.</b> | <b>-95% C.I.</b> |
|----------------------------|-----------------|-------------|------------------|------------------|
| 263: <i>p</i>              | 0.139           | 0.006       | 0.128            | 0.151            |
| 264: <i>p</i>              | 0.142           | 0.006       | 0.131            | 0.154            |
| 265: <i>p</i>              | 0.145           | 0.006       | 0.135            | 0.157            |
| 266: <i>p</i>              | 0.149           | 0.006       | 0.138            | 0.160            |
| 267: <i>p</i>              | 0.152           | 0.006       | 0.142            | 0.163            |
| 268: <i>p</i>              | 0.156           | 0.006       | 0.146            | 0.167            |
| 269: <i>p</i>              | 0.160           | 0.006       | 0.150            | 0.171            |
| 270: <i>p</i>              | 0.165           | 0.006       | 0.154            | 0.176            |
| 271: <i>p</i>              | 0.170           | 0.006       | 0.159            | 0.181            |
| 272: <i>p</i>              | 0.175           | 0.006       | 0.164            | 0.187            |
| 273: <i>p</i>              | 0.181           | 0.006       | 0.169            | 0.193            |
| 274: <i>p</i>              | 0.187           | 0.006       | 0.175            | 0.200            |
| 275: <i>p</i>              | 0.194           | 0.007       | 0.181            | 0.208            |
| 276: <i>p</i>              | 0.201           | 0.007       | 0.187            | 0.216            |
| 277: <i>p</i>              | 0.209           | 0.008       | 0.193            | 0.225            |
| 278: <i>p</i>              | 0.218           | 0.009       | 0.200            | 0.236            |
| 279: <i>p</i>              | 0.227           | 0.010       | 0.208            | 0.247            |
| 280: <i>p</i>              | 0.237           | 0.011       | 0.216            | 0.260            |
| 281: <i>p</i>              | 0.248           | 0.013       | 0.225            | 0.274            |
| 282: <i>p</i>              | 0.261           | 0.014       | 0.234            | 0.289            |
| 283: <i>p</i>              | 0.274           | 0.016       | 0.244            | 0.306            |
| 284: <i>p</i>              | 0.288           | 0.018       | 0.255            | 0.325            |
| 285: <i>p</i>              | 0.304           | 0.020       | 0.266            | 0.345            |
| 286: <i>p</i>              | 0.321           | 0.023       | 0.279            | 0.367            |
